# Supplementary material
Source: PubMed Central journal article supplement (PMC5916025)
Supplement: NIHMS944717-supplement-supplement_1.pdf [file NIHMS944717-supplement-supplement_1.pdf]

## SUPPLEMENTARY MATERIAL

### **Home-cage gastrocnemius and BAT temperatures after intra-VMH MTII in HCR and LCR.**

Hind limb muscle and BAT temperatures were measured at baseline and every 15 min for 240 min after intra-VMH vehicle or MTII microinjection in HCR and LCR. Changes in temperature from individual baseline values were calculated to factor out individual differences in baseline temperature. Intra-VMH MTII induced some change in temperature in BAT in HCR and LCR rats (Figure S1), but was less effective in inducing changes in muscle temperature (Figure S2).

For BAT, there was a small increase in temperature which peaked about one hour after injection. There was a main effect of time but not MTII on BAT temperature, and a significant interaction where the effect of MTII depended on the time after injection. Because of the significant interaction between line and time, HCR and LCR were analyzed separately; in both lines, there was a main effect of MTII and an interaction between MTII and time, where the MTII-induced BAT thermogenesis depended on time since treatment.

There was a significant interaction in change in BAT temperature from baseline where MTII induced a significant deviation from baseline temperature but vehicle microinjection did not. There were also significant main effects of time and MTII, and an interaction between line and time since injection (see Figure S1).

In both the left and right gastrocnemius muscles groups, there was a main effect of time where temperature changed over time. This follows the daily rhythm in baseline muscle temperature we have demonstrated previously (where temperature falls throughout the light phase), which in turn follows the daily rhythm in physical activity levels. There were no main effects of line

(HCR/LCR) or MTII in either the right or left gastrocnemius temperatures. The right gastrocnemius showed a significant interaction where HCR and LCR showed different temperatures depending on the time after injection, but this did not interact with MTII. Similarly, for the mean temperature of both left and right gastrocnemius, there was a main effect of time where mean gastrocnemius temperature changed over time, but no other main effects or interactions.

As shown in Figure S2, when change in gastrocnemius temperature was calculated according to each rat's baseline temperature, there were no significant main effects of line or MTII, but the right gastrocnemius showed a main effect of time where the change in temperature from baseline changed over time (trend in the left gastrocnemius,  $p=0.057$ ). There was a significant MTII-by-time interaction where the right gastrocnemius showed a significant increase in temperature from baseline in the right leg in the latter half of the test, but this did not differ between HCR and LCR. Similarly, for the mean temperature of both left and right gastrocnemius, there was a main effect of time where change in temperature from baseline changed over time, but no other main effects or interactions.

**Figure S1.**

Brown adipose tissue (BAT) change from baseline temperature in high- and low-capacity runners (HCR, LCR) after intra-ventromedial hypothalamic microinjection of vehicle (Veh) or the mixed melanocortin receptor agonist Melanotan II (MTII). Compared to vehicle microinjection, MTII induced a significantly greater increase in temperature above baseline temperature in both HCR (45 min-105 min, and at 150 min after MTII) and LCR (15 min-105 min, and at 165 min after MTII; \* $p < 0.05$ ).

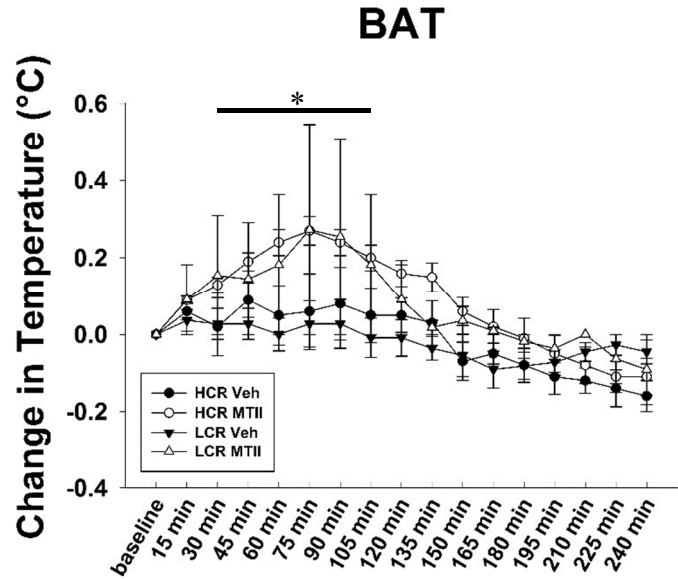**Figure S2.**

Mean right and left gastrocnemius temperature over 4 hours in the home cage, increase above baseline temperature in high- and low-capacity runners (HCR, LCR) after intra-ventromedial hypothalamic microinjection of vehicle (Veh) or the mixed melanocortin receptor agonist Melanotan II (MTII). The increase in temperature above baseline levels changed over time, but there were not differences between HCR and LCR, and no significant effect of MTII compared to vehicle treatment.

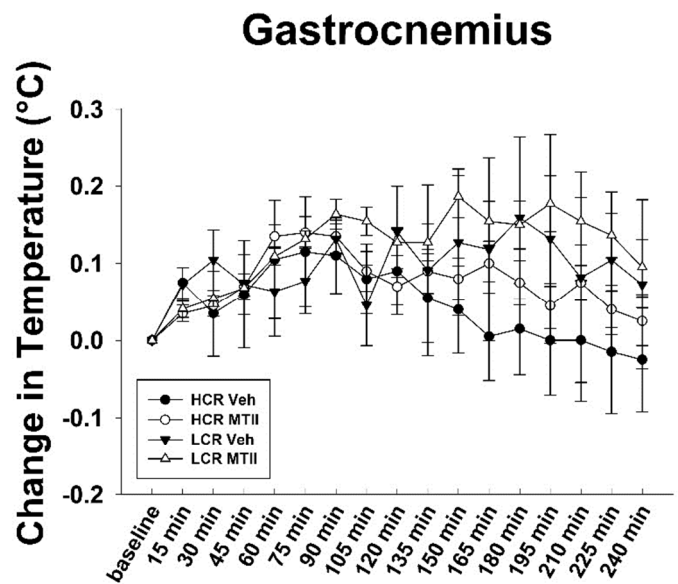

## Methods

### mRNA and protein expression

Following assay IDs were obtained from IDT technologies for gene expression assays – Gapdh, Rn.PT. 39a.11180736.g; Beta3 adrenergic receptor, Rn.PT.58.35740415; UCP1, Rn.PT.56a.14277400; PPAR $\alpha$ , Rn.PT.58.35766078; PPAR $\delta$ , Rn.PT.58.6572075; PPAR $\gamma$ , Rn.PT.58.6036576; PGC1 $\alpha$ , Rn.PT.58.37655048; UCP2, Rn.PT.58.12555837; UCP3, Rn.PT.58.17938212; SERCA1, Rn.PT.58.35312973; SERCA2, Rn.PT.58.8873034; Kir6.1, Rn.PT.58.38199111; Med1, Rn.PT.58.8279221. Probes were diluted as per IDT instructions before proceeding to quantification of gene expression. Data were calculated using  $\Delta$ Ct method and all data are expressed using mean  $\pm$  SEM relative to HCR vehicle group set at 100%

To evaluate protein expression, primary antibodies against beta 3 adrenergic receptor, UCP1, PPAR $\alpha$ , PPAR $\delta$ , PPAR $\gamma$ , PGC1 $\alpha$ , ACC, p-ACC, AMPK, p-AMPK, CD36, FAS, UCP2, beta2 adrenergic receptor, UCP3, SERCA1, SERCA2 (ab101095, ab10983, ab8934, ab23673, ab41928, ab54481, ab45174, ab68191, ab80039, ab133448, ab64014, ab22759, ab67241, ab182136, ab3477, ab2819, ab2861 respectively from Abcam); Kir6.2 and MED1 (sc-11226 and sc-5334 from Santa Cruz), and Kir6.1 (SAB2101220, Sigma-Aldrich) were obtained and incubated with the blot overnight at 4°C and with either anti-rabbit or anti-mouse secondary (ab6721, ab6789 respectively from Abcam) for 1 hr at room temperature. Blots were developed using an Amersham chemiluminescence kit and data expressed as mean  $\pm$  SEM relative to HCR vehicle group set at 100%.

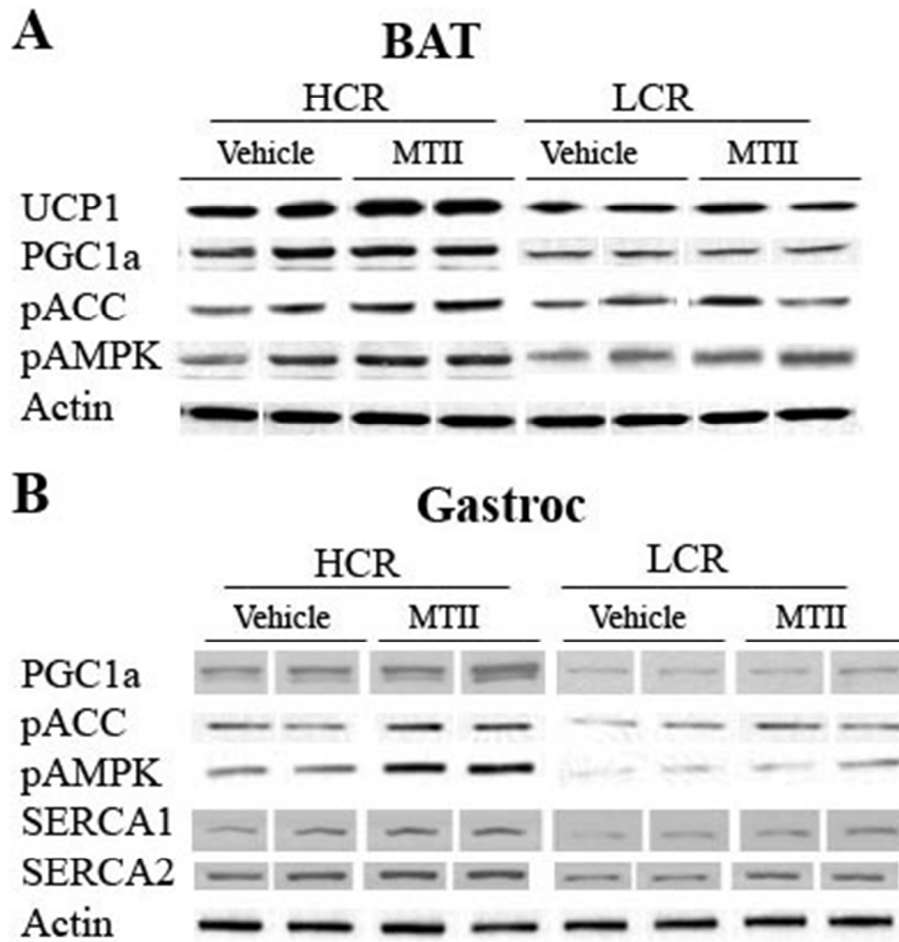

**Figure S3.** Representative Western blot images of (A) brown adipose tissue (BAT) and (B) gastrocnemius (gastroc) muscle of HCR and LCR treated with either the non-specific melanocortin receptor agonist Melanotan II (MTII) or vehicle (aCSF) in the ventromedial hypothalamus.

**Table S1.** Body weight and composition in high- and low-capacity runners (HCR, LCR) treated with vehicle (veh) and melanotan II (MTII); Mean $\pm$ SEM

| Experiment                                |           | HCR                   |                       |                   | LCR                   |                       |                   |
|-------------------------------------------|-----------|-----------------------|-----------------------|-------------------|-----------------------|-----------------------|-------------------|
|                                           |           | vehicle               | MTII                  | percent change    | vehicle               | MTII                  | percent change    |
| Home-cage gastrocnemius & BAT temperature | BW        | 413.31<br>$\pm$ 18.75 | 410.15<br>$\pm$ 18.86 | veh>MTII<br>0.77% | 500.11<br>$\pm$ 21.15 | 496.01<br>$\pm$ 20.85 | veh>MTII<br>0.83% |
| 4-hr energy expenditure                   | BW        | 407.92<br>$\pm$ 19.21 | 410.60<br>$\pm$ 18.89 |                   | 494.13<br>$\pm$ 19.79 | 496.27<br>$\pm$ 20.43 |                   |
|                                           | fat mass  | 66.99<br>$\pm$ 7.49   | 67.3<br>$\pm$ 7.50    |                   | 106.76<br>$\pm$ 11.70 | 107.5<br>$\pm$ 11.49  |                   |
|                                           | lean mass | 252.26<br>$\pm$ 10.57 | 255.44<br>$\pm$ 10.70 | MTII>veh<br>1.26% | 288.51<br>$\pm$ 11.05 | 286.50<br>$\pm$ 11.24 |                   |
| Treadmill activity thermogenesis          | BW        | 405.63<br>$\pm$ 19.28 | 408.33<br>$\pm$ 19.41 | MTII>veh<br>0.67% | 487.53<br>$\pm$ 26.54 | 490.19<br>$\pm$ 27.92 |                   |
|                                           | fat mass  | 68.29<br>$\pm$ 7.20   | 68.76<br>$\pm$ 7.22   | MTII>veh<br>0.69% | 106.73<br>$\pm$ 15.74 | 107.43<br>$\pm$ 16.16 |                   |
|                                           | lean mass | 255.20<br>$\pm$ 11.62 | 256.8<br>$\pm$ 11.69  | MTII>veh<br>0.66% | 285.3<br>$\pm$ 8.62   | 286.78<br>$\pm$ 9.33  |                   |
| Treadmill activity energy expenditure     | BW        | 401.00<br>$\pm$ 18.59 | 403.64<br>$\pm$ 19.52 |                   | 505.55<br>$\pm$ 21.12 | 500.29<br>$\pm$ 20.90 | veh>MTII<br>1.05% |
|                                           | fat mass  | 59.48<br>$\pm$ 6.84   | 60.00<br>$\pm$ 7.40   |                   | 114.65<br>$\pm$ 13.18 | 110.27<br>$\pm$ 12.48 |                   |
|                                           | lean mass | 251.20<br>$\pm$ 10.24 | 260.61<br>$\pm$ 11.51 |                   | 293.62<br>$\pm$ 11.63 | 283.88<br>$\pm$ 10.65 | veh>MTII<br>3.43% |

Percent change reported on values that showed significant change between treatments, within line ( $p < 0.05$ ). Body weights taken immediately before microinjection; lean and fat mass measured 2 days prior to microinjection. BAT, brown adipose tissue; BW, body weight.

**Table S2.** Statistical results from analyses examining the effect of intra-ventromedial hypothalamic (VMH) Melanotan II (MTII) and vehicle on gas-exchange variables and physical activity in high- and low-capacity runners (HCR, LCR).

| Home-cage energy expenditure                                                                                     |                                        |       | Main effects |         | Interaction |
|------------------------------------------------------------------------------------------------------------------|----------------------------------------|-------|--------------|---------|-------------|
|                                                                                                                  |                                        |       | MTII/vehicle | HCR/LCR |             |
|                                                                                                                  | VO <sub>2</sub><br>(ml/kg/hr)          | F     | 314.85       | 26.925  | 20.585      |
|                                                                                                                  |                                        | df    | 1,19         | 1,19    | 1,19        |
|                                                                                                                  |                                        | p     | <0.001       | <0.001  | <0.001      |
|                                                                                                                  | VCO <sub>2</sub><br>(ml/kg/hr)         | F     | 244.741      | 28.812  | 22.3        |
|                                                                                                                  |                                        | df    | 1,19         | 1,19    | 1,19        |
|                                                                                                                  |                                        | p     | <0.001       | <0.001  | <0.001      |
|                                                                                                                  | RER                                    | F     | 43.193       | 0.031   | 0.053       |
|                                                                                                                  |                                        | df    | 1,19         | 1,19    | 1,19        |
|                                                                                                                  |                                        | p     | <0.001       | 0.863   | 0.820       |
|                                                                                                                  | EE (kcal/hr)                           | F     | 323.878      | 0.668   | 9.415       |
|                                                                                                                  |                                        | df    | 1,19         | 1,19    | 1,19        |
|                                                                                                                  |                                        | p     | <0.001       | 0.424   | 0.006       |
|                                                                                                                  | Horizontal<br>activity<br>counts       | F     | 92.459       | 9.563   | 12.292      |
|                                                                                                                  |                                        | df    | 1,19         | 1,19    | 1,19        |
|                                                                                                                  |                                        | p     | <0.001       | 0.006   | 0.049524    |
|                                                                                                                  | Ambulatory<br>activity<br>counts       | F     | 63.003       | 4.263   | 0.536       |
|                                                                                                                  |                                        | df    | 1,19         | 1,19    | 1,19        |
|                                                                                                                  |                                        | p     | <0.001       | 0.048   | 0.473       |
| Vertical<br>activity<br>counts                                                                                   | F                                      | 1.145 | 11.927       | 0.542   |             |
|                                                                                                                  | df                                     | 1,19  | 1,19         | 1,19    |             |
|                                                                                                                  | p                                      | 0.707 | 0.003        | 0.471   |             |
| Analysis of covariance                                                                                           |                                        |       |              |         |             |
|                                                                                                                  | EE with body<br>weight as<br>covariate | F     | 0.224        | 9.694   | 15.062      |
|                                                                                                                  |                                        | df    | 1,17         | 1,17    | 1,17        |
|                                                                                                                  |                                        | p     | 0.642        | 0.006   | 0.001       |
|                                                                                                                  | EE with lean<br>mass as<br>covariate   | F     | 0.657        | 12.406  | 8.474       |
|                                                                                                                  |                                        | df    | 1,17         | 1,17    | 1,17        |
|                                                                                                                  |                                        | p     | 0.429        | 0.003   | 0.010       |
| Each covariate was significant, and there were no interactions between treatment (effect of MTII) and covariates |                                        |       |              |         |             |

EE, energy expenditure; RER, respiratory exchange ratio (VCO<sub>2</sub>/VO<sub>2</sub>).

**Table S3.** Statistical results from analyses examining the effect of intra-ventromedial hypothalamic (VMH) Melanotan II (MTII) and vehicle on gas-exchange variables in high- and low-capacity runners (HCR, LCR) during treadmill walking activity (walking 7 meters/min for 30 min).

| Treadmill energy expenditure                                                                                     |                                  |    | Main effects |         | Interaction |
|------------------------------------------------------------------------------------------------------------------|----------------------------------|----|--------------|---------|-------------|
|                                                                                                                  |                                  |    | MTII/vehicle | HCR/LCR |             |
|                                                                                                                  | VO <sub>2</sub> (ml/kg/hr)       | F  | 27.266       | 1.604   | 3.473       |
|                                                                                                                  |                                  | df | 1,14         | 1,14    | 1,14        |
|                                                                                                                  |                                  | p  | <0.001       | 0.226   | 0.084       |
|                                                                                                                  | VCO <sub>2</sub> (ml/kg/hr)      | F  | 0.976        | 0.081   | 26.192      |
|                                                                                                                  |                                  | df | 1,14         | 1,14    | 1,14        |
|                                                                                                                  |                                  | p  | 0.34         | 0.781   | <0.001      |
|                                                                                                                  | RER                              | F  | 57.619       | 23.059  | 5.461       |
|                                                                                                                  |                                  | df | 1,14         | 1,14    | 1,14        |
|                                                                                                                  |                                  | p  | <0.001       | <0.001  | 0.035       |
|                                                                                                                  | EE (kcal/hr)                     | F  | 38.207       | 7.136   | 11.114      |
|                                                                                                                  |                                  | df | 1,14         | 1,14    | 1,14        |
|                                                                                                                  |                                  | p  | <0.001       | 0.018   | 0.005       |
| Analysis of covariance                                                                                           |                                  |    |              |         |             |
|                                                                                                                  | EE with body weight as covariate | F  | 0.079        | 0.198   | 8.555       |
|                                                                                                                  |                                  | df | 1,13         | 1,13    | 1,13        |
|                                                                                                                  |                                  | p  | 0.783        | 0.664   | 0.012       |
|                                                                                                                  | EE with lean mass as covariate   | F  | 0.15         | 2.342   | 8.946       |
|                                                                                                                  |                                  | df | 1,13         | 1,13    | 1,13        |
|                                                                                                                  |                                  | p  | 0.705        | 0.15    | 0.100       |
| Each covariate was significant, and there were no interactions between treatment (effect of MTII) and covariates |                                  |    |              |         |             |

EE, energy expenditure; RER, respiratory exchange ratio (VCO<sub>2</sub>/VO<sub>2</sub>).



**Table S4.** Statistical results from analyses examining the effect of intra-ventromedial hypothalamic (VMH) Melanotan II (MTII) and vehicle on gastrocnemius muscle temperature over the course of 4 hrs after treatment in high- and low-capacity runners (HCR, LCR).

| Home cage muscle temperature                         |    | Main effects |        |         | Interactions     |             |                  |                         |
|------------------------------------------------------|----|--------------|--------|---------|------------------|-------------|------------------|-------------------------|
|                                                      |    | MTII/vehicle | Time   | HCR/LCR | Treatment x line | Time x line | Treatment x time | Treatment x time x line |
| Right leg temperature                                | F  | 0.081        | 4.330  | 1.264   | 0.183            | 1.682       | 0.541            | 0.411                   |
|                                                      | df | 1,19         | 16,4   | 1,19    | 1,19             | 16,4        | 16,4             | 16,4                    |
|                                                      | p  | 0.779        | <0.001 | 0.275   | 0.673            | 0.049       | 0.924            | 0.979                   |
| Left leg temperature                                 | F  | 1.170        | 1.826  | 0.693   | 0.001            | 1.289       | 0.924            | 0.533                   |
|                                                      | df | 1,19         | 16,4   | 1,19    | 1,19             | 16,4        | 16,4             | 16,4                    |
|                                                      | p  | 0.393        | 0.027  | 0.415   | 0.975            | 0.202       | 0.542            | 0.929                   |
| Average L and R leg temperature                      | F  | 0.129        | 2.622  | 1.001   | 0.066            | 1.610       | 0.760            | 0.296                   |
|                                                      | df | 1,19         | 16,4   | 1,19    | 1,19             | 16,4        | 16,4             | 16,4                    |
|                                                      | p  | 0.724        | 0.001  | 0.330   | 0.801            | 0.065       | 0.730            | 0.997                   |
| Right leg temperature change from baseline           | F  | 2.973        | 2.939  | 0.842   | 0.295            | 1.354       | 2.454            | 0.436                   |
|                                                      | df | 1,19         | 16,4   | 1,19    | 1,19             | 16,4        | 16,4             | 16,4                    |
|                                                      | p  | 0.101        | <0.001 | 0.370   | 0.593            | 0.164       | 0.002            | 0.972                   |
| Left leg temperature change from baseline            | F  | 0.091        | 1.644  | 1.138   | 0.338            | 1.655       | 0.633            | 0.359                   |
|                                                      | df | 1,19         | 16,4   | 1,19    | 1,19             | 16,4        | 16,4             | 16,4                    |
|                                                      | p  | 0.766        | 0.057  | 0.229   | 0.568            | 0.055       | 0.856            | 0.990                   |
| Average R and L leg temperature change from baseline | F  | 0.550        | 2.622  | 1.183   | 0.003            | 1.610       | 0.760            | 0.296                   |
|                                                      | df | 1,19         | 16,4   | 1,19    | 1,19             | 16,4        | 16,4             | 16,4                    |
|                                                      | p  | 0.467        | 0.001  | 0.290   | 0.957            | 0.065       | 0.730            | 0.997                   |
| BAT temperature                                      | F  | 0.260        | 29.481 | 0.042   | 0.372            | 2.471       | 5.363            | 0.503                   |
|                                                      | df | 1,19         | 16,4   | 1,19    | 1,19             | 16,4        | 16,4             | 16,4                    |
|                                                      | p  | 0.616        | <0.001 | 0.841   | 0.549            | 0.002       | p<0.001          | 0.945                   |
| BAT temperature change from baseline                 | F  | 8.816        | 29.481 | 0.072   | 0.005            | 2.471       | 5.363            | 0.503                   |
|                                                      | df | 1,19         | 16,4   | 1,19    | 1,19             | 16,4        | 16,4             | 16,4                    |
|                                                      | p  | 0.008        | <0.001 | 0.792   | 0.945            | 0.002       | <0.01            | 0.945                   |

**Table S5.** Statistical results from analyses examining the effect of intra-ventromedial hypothalamic (VMH) Melanotan II (MTII) and vehicle on gastrocnemius muscle temperature during treadmill walking in high- and low-capacity runners (HCR, LCR).

| Treadmill-activity muscle temperature                |    | Main effects |         |         | Interactions     |             |                  |                         |
|------------------------------------------------------|----|--------------|---------|---------|------------------|-------------|------------------|-------------------------|
|                                                      |    | MTII/vehicle | Time    | HCR/LCR | Treatment x line | Time x line | Treatment x time | Treatment x time x line |
| Right leg temperature                                | F  | 1.470        | 127.156 | 0.016   | 0.007            | 20.176      | 3.773            | 3.524                   |
|                                                      | df | 1,14         | 5,10    | 1,14    | 1,14             | 5,10        | 5,10             | 5,10                    |
|                                                      | p  | 0.245        | <0.001  | 0.900   | 0.933            | <0.001      | 0.004            | 0.007                   |
| Left leg temperature                                 | F  | 0.224        | 199.702 | 0.091   | 0.001            | 19.409      | 3.161            | 2.534                   |
|                                                      | df | 1,14         | 5,10    | 1,14    | 1,14             | 5,10        | 5,10             | 5,10                    |
|                                                      | p  | 0.643        | <0.001  | 0.767   | 0.971            | <0.001      | 0.120            | 0.036                   |
| Average L and R leg temperature                      | F  | 0.860        | 190.009 | 0.006   | 0.005            | 24.529      | 4.772            | 4.219                   |
|                                                      | df | 1,14         | 5,10    | 1,14    | 1,14             | 5,10        | 5,10             | 5,10                    |
|                                                      | p  | 0.370        | <0.001  | 0.937   | 0.947            | <0.001      | 0.001            | 0.002                   |
| Right leg temperature change from baseline           | F  | 0.878        | 127.165 | 16.039  | 0.878            | 20.176      | 3.773            | 3.524                   |
|                                                      | df | 1,14         | 5,10    | 1,14    | 1,14             | 5,10        | 5,10             | 5,10                    |
|                                                      | p  | 0.365        | <0.001  | 0.001   | 0.365            | <0.001      | 0.004            | 0.007                   |
| Left leg temperature change from baseline            | F  | 2.754        | 199.702 | 17.345  | 0.172            | 19.409      | 3.161            | 2.534                   |
|                                                      | df | 1,14         | 5,10    | 1,14    | 1,14             | 5,10        | 5,10             | 5,10                    |
|                                                      | p  | 0.119        | <0.001  | 0.001   | 0.685            | <0.001      | 0.120            | 0.036                   |
| Average R and L leg temperature change from baseline | F  | 2.577        | 199.009 | 18.920  | 0.706            | 24.529      | 4.772            | 4.219                   |
|                                                      | df | 1,14         | 5,10    | 1,14    | 1,14             | 5,10        | 5,10             | 5,10                    |
|                                                      | p  | 0.131        | <0.001  | 0.001   | 0.415            | <0.001      | 0.001            | 0.002                   |
| BAT temperature (before and after activity)          | F  | 1.170        | 11.051  | 1.061   | 1.453            | 10.000      | 2.133            | 0.050                   |
|                                                      | df | 1,14         | 1,14    | 1,14    | 1,14             | 1,14        | 1,14             | 1,14                    |
|                                                      | p  | 0.231        | <0.001  | 0.320   | 0.248            | 0.007       | 0.166            | 0.825                   |
| BAT temperature change from baseline                 | F  | 2.133        | N/A     | 10.000  | 0.050            | N/A         | N/A              | N/A                     |
|                                                      | df | 1,14         |         | 1,14    | 1,14             |             |                  |                         |
|                                                      | p  | 0.166        |         | 0.007   | 0.825            |             |                  |                         |

Analysis included temperatures though 20 min of treadmill walking to encompass data for all rats, before any rats became noncompliant with treadmill-waling protocol. BAT temperatures were measured once before and once after treadmill walking (significant decrease over time, larger decrease in HCR).

| Norepinephrine turnover (NETO) |    | Main effects |         | Interaction |
|--------------------------------|----|--------------|---------|-------------|
|                                |    | MTII/vehicle | HCR/LCR |             |
| BAT                            | F  | 572.245      | 52.627  | 127.835     |
|                                | df | 1,13         | 1,13    | 1,13        |
|                                | p  | <0.001       | <0.001  | <0.001      |
| MWAT                           | F  | 115.306      | 21.661  | 27.274      |
|                                | df | 1,13         | 1,13    | 1,13        |
|                                | p  | <0.001       | <0.001  | <0.001      |
| RWAT                           | F  | 160.033      | 1.961   | 1.116       |
|                                | df | 1,13         | 1,13    | 1,13        |
|                                | p  | <0.001       | 0.183   | 0.309       |
| EWAT                           | F  | 309.205      | 11.503  | 11.883      |
|                                | df | 1,13         | 1,13    | 1,13        |
|                                | p  | <0.001       | 0.004   | 0.004       |
| GWAT                           | F  | 314.589      | 13.91   | 202.977     |
|                                | df | 1,13         | 1,13    | 1,13        |
|                                | p  | <0.001       | 0.002   | <0.001      |
| IWAT                           | F  | 258.613      | 8.474   | 65.392      |
|                                | df | 1,13         | 1,13    | 1,13        |
|                                | p  | <0.001       | 0.012   | <0.001      |
| Liver                          | F  | 107.912      | 7.332   | 19.324      |
|                                | df | 1,13         | 1,13    | 1,13        |
|                                | p  | <0.001       | 0.018   | 0.001       |
| Heart                          | F  | 166.185      | 3.935   | 4.952       |
|                                | df | 1,13         | 1,13    | 1,13        |
|                                | p  | <0.001       | 0.069   | 0.044       |
| Soleus                         | F  | 276.059      | 70.096  | 46.498      |
|                                | df | 1,13         | 1,13    | 1,13        |
|                                | p  | <0.001       | <0.001  | <0.001      |
| EDL                            | F  | 392.559      | 9.193   | 6.119       |
|                                | df | 1,13         | 1,13    | 1,13        |
|                                | p  | <0.001       | 0.009   | 0.027       |
| Quadriceps                     | F  | 298.337      | 36.944  | 9.053       |
|                                | df | 1,13         | 1,13    | 1,13        |
|                                | p  | <0.001       | <0.001  | 0.009       |
| Lateral gastrocnemius          | F  | 290.798      | 17.969  | 10.142      |
|                                | df | 1,13         | 1,13    | 1,13        |
|                                | p  | <0.001       | 0.001   | 0.007       |
| Medial gastrocnemius           | F  | 193.457      | 5.539   | 2.903       |
|                                | df | 1,13         | 1,13    | 1,13        |
|                                | p  | <0.001       | 0.034   | 0.110       |

**Table S6.** Statistical results from analyses examining the effect of intra-ventromedial hypothalamic (VMH) Melanotan II (MTII) and vehicle on norepinephrine turnover (NETO) in high- and low-capacity runners (HCR, LCR).

BAT, brown adipose tissue; MWAT, mesenteric white adipose tissue; RWAT, retroperitoneal white adipose tissue; EWAT, epididymal white adipose tissue; GWAT, gluteal white adipose tissue; IWAT, inguinal white adipose tissue; EDL, extensor digitorum longus.

**Table S7.** Statistical results from analyses examining the effect of intra-ventromedial hypothalamic (VMH) Melanotan II (MTII) and vehicle on brown adipose tissue (BAT) mRNA expression using qPCR in high- and low-capacity runners (HCR, LCR).

| Brown adipose tissue (BAT) |    | Main effects |         | Interaction | t-test for MTII≠vehicle |       |
|----------------------------|----|--------------|---------|-------------|-------------------------|-------|
|                            |    | MTII/vehicle | HCR/LCR |             | HCR                     | LCR   |
| β3-AR                      | F  | 0.376        | 3.527   | 0.272       |                         |       |
|                            | df | 1,28         | 1,28    | 1,28        |                         |       |
|                            | p  | 0.544        | 0.071   | 0.606       | 0.480                   | 0.102 |
| UCP1                       | F  | 19.477       | 60.218  | 1.437       |                         |       |
|                            | df | 1,28         | 1,28    | 1,28        |                         |       |
|                            | p  | <0.001       | <0.001  | 0.241       | 0.001                   | 0.020 |
| PPARα                      | F  | 19.502       | 37.072  | 1.892       |                         |       |
|                            | df | 1,28         | 1,28    | 1,28        |                         |       |
|                            | p  | <0.001       | <0.001  | 0.18        | 0.002                   | 0.008 |
| PPARδ                      | F  | 31.913       | 37.072  | 0.112       |                         |       |
|                            | df | 1,28         | 1,28    | 1,28        |                         |       |
|                            | p  | <0.001       | <0.001  | 0.74        | 0.000                   | 0.024 |
| PPARγ                      | F  | 23.261       | 46.191  | 1.736       |                         |       |
|                            | df | 1,28         | 1,28    | 1,28        |                         |       |
|                            | p  | <0.001       | <0.001  | 0.198       | 0.000                   | 0.033 |
| PGC1α                      | F  | 21.241       | 37.49   | 2.907       |                         |       |
|                            | df | 1,28         | 1,28    | 1,28        |                         |       |
|                            | p  | <0.001       | <0.001  | 0.099       | 0.001                   | 0.007 |

β3-AR, Beta-3 adrenergic receptor; UCP1, uncoupling protein 1; PPAR, peroxisome proliferator activated receptor; PGC1α, PPARγ coactivator-1α.

**Table S8.** Statistical results from analyses examining the effect of intra-ventromedial hypothalamic (VMH) Melanotan II (MTII) and vehicle on white adipose tissue (WAT) mRNA expression using qPCR in high- and low-capacity runners (HCR, LCR).

| White adipose tissue (WAT) |    | Main effects |         | Interaction | t-test for MTII≠vehicle |       |
|----------------------------|----|--------------|---------|-------------|-------------------------|-------|
|                            |    | MTII/vehicle | HCR/LCR |             | HCR                     | LCR   |
| β3-AR                      | F  | 4.877        | 22.009  | 0.375       |                         |       |
|                            | df | 1,28         | 1,28    | 1,28        |                         |       |
|                            | p  | 0.36         | <0.001  | 0.545       | 0.050                   | 0.101 |
| UCP2                       | F  | 2.184        | 37.707  | 0.168       |                         |       |
|                            | df | 1,28         | 1,28    | 1,28        |                         |       |
|                            | p  | 0.151        | <0.001  | 0.685       | 0.129                   | 0.194 |
| PPARα                      | F  | 22.384       | 37.856  | 0.536       |                         |       |
|                            | df | 1,28         | 1,28    | 1,28        |                         |       |
|                            | p  | <0.001       | <0.001  | 0.47        | 0.002                   | 0.003 |
| PPARδ                      | F  | 31.913       | 37.072  | 0.112       |                         |       |
|                            | df | 1,28         | 1,28    | 1,28        |                         |       |
|                            | p  | <0.001       | <0.001  | 0.74        | 0.001                   | 0.000 |
| PPARγ                      | F  | 14.813       | 31.963  | 1.163       |                         |       |
|                            | df | 1,28         | 1,28    | 1,28        |                         |       |
|                            | p  | 0.001        | <0.001  | 0.29        | 0.005                   | 0.012 |
| PGC1α                      | F  | 2.235        | 31.472  | 0.473       |                         |       |
|                            | df | 1,28         | 1,28    | 1,28        |                         |       |
|                            | p  | 0.146        | <0.001  | 0.497       | 0.066                   | 0.295 |

β3-AR, Beta-3 adrenergic receptor; UCP2, uncoupling protein 2; PPAR, peroxisome proliferator activated receptor; PGC1α, PPARγ coactivator-1α.

**Table S9.** Statistical results from analyses examining the effect of intra-ventromedial hypothalamic (VMH) Melanotan II (MTII) and vehicle on liver mRNA expression using qPCR in high- and low-capacity runners (HCR, LCR).

| Liver |    | Main effects |         | Interaction | t-test for MTII≠vehicle |       |
|-------|----|--------------|---------|-------------|-------------------------|-------|
|       |    | MTII/vehicle | HCR/LCR |             | HCR                     | LCR   |
| β2-AR | F  | 8.913        | 13.8    | 0.056       |                         |       |
|       | df | 1,28         | 1,28    | 1,28        |                         |       |
|       | p  | 0.006        | 0.001   | 0.814       | 0.042                   | 0.016 |
| UCP2  | F  | 14.544       | 20.254  | 1.239       |                         |       |
|       | df | 1,28         | 1,28    | 1,28        |                         |       |
|       | p  | 0.001        | <0.001  | 0.275       | 0.002                   | 0.033 |
| PPARα | F  | 31.701       | 18.427  | 1.608       |                         |       |
|       | df | 1,28         | 1,28    | 1,28        |                         |       |
|       | p  | <0.001       | <0.001  | 0.215       | 0.001                   | 0.000 |
| PPARδ | F  | 74.835       | 48.171  | 6.878       |                         |       |
|       | df | 1,28         | 1,28    | 1,28        |                         |       |
|       | p  | <0.001       | <0.001  | 0.014       | 0.000                   | 0.000 |
| PPARγ | F  | 31.376       | 15.815  | 1.938       |                         |       |
|       | df | 1,28         | 1,28    | 1,28        |                         |       |
|       | p  | <0.001       | <0.001  | 0.175       | 0.001                   | 0.001 |
| PGC1α | F  | 52.246       | 28.808  | 1.814       |                         |       |
|       | df | 1,28         | 1,28    | 1,28        |                         |       |
|       | p  | <0.001       | <0.001  | 0.189       | 0.000                   | 0.000 |

B2-AR, Beta-2 adrenergic receptor; UCP2, uncoupling protein 2; PPAR, peroxisome proliferator activated receptor; PGC1α, PPARγ coactivator-1α.

**Table S10.** Statistical results from analyses examining the effect of intra-ventromedial hypothalamic (VMH) Melanotan II (MTII) and vehicle on gastrocnemius mRNA expression using qPCR in high- and low-capacity runners (HCR, LCR).

| Gastrocnemius |    | Main effects |         | Interaction | t-test for MTII≠vehicle |       |
|---------------|----|--------------|---------|-------------|-------------------------|-------|
|               |    | MTII/vehicle | HCR/LCR |             | HCR                     | LCR   |
| β2-AR         | F  | 9.498        | 22.179  | 2.201       |                         |       |
|               | df | 1,28         | 1,28    | 1,28        |                         |       |
|               | p  | 0.005        | <0.001  | 0.149       | 0.009                   | 0.069 |
| UCP2          | F  | 13.382       | 19.927  | 0.388       |                         |       |
|               | df | 1,28         | 1,28    | 1,28        |                         |       |
|               | p  | 0.001        | <0.001  | 0.536       | 0.014                   | 0.003 |
| UCP3          | F  | 23.574       | 15.735  | 0.293       |                         |       |
|               | df | 1,28         | 1,28    | 1,28        |                         |       |
|               | p  | <0.001       | <0.001  | 0.592       | 0.002                   | 0.002 |
| PPARα         | F  | 14.728       | 17.598  | 0.31        |                         |       |
|               | df | 1,28         | 1,28    | 1,28        |                         |       |
|               | p  | 0.001        | <0.001  | 0.582       | 0.003                   | 0.020 |
| PPARδ         | F  | 13.702       | 23.685  | 1.572       |                         |       |
|               | df | 1,28         | 1,28    | 1,28        |                         |       |
|               | p  | 0.001        | <0.001  | 0.22        | 0.004                   | 0.030 |
| PPARγ         | F  | 22.747       | 15.151  | 1.714       |                         |       |
|               | df | 1,28         | 1,28    | 1,28        |                         |       |
|               | p  | <0.001       | 0.001   | 0.201       | 0.001                   | 0.003 |
| PGC1α         | F  | 9.778        | 13.544  | 0.474       |                         |       |
|               | df | 1,28         | 1,28    | 1,28        |                         |       |
|               | p  | 0.004        | 0.001   | 0.497       | 0.016                   | 0.030 |
| SERCA1        | F  | 11.077       | 25.884  | 2.067       |                         |       |
|               | df | 1,28         | 1,28    | 1,28        |                         |       |
|               | p  | <0.001       | <0.001  | 0.162       | 0.003                   | 0.095 |
| SERCA2        | F  | 19.816       | 15.613  | 1.93        |                         |       |
|               | df | 1,28         | 1,28    | 1,28        |                         |       |
|               | p  | <0.001       | <0.001  | 0.176       | 0.003                   | 0.001 |
| Kir6.1        | F  | 3.269        | 38.247  | 0.484       |                         |       |
|               | df | 1,28         | 1,28    | 1,28        |                         |       |
|               | p  | 0.081        | <0.001  | 0.492       | 0.059                   | 0.206 |
| Kir6.2        | F  | 9.39         | 42.931  | 1.001       |                         |       |
|               | df | 1,28         | 1,28    | 1,28        |                         |       |
|               | p  | 0.005        | <0.001  | 0.326       | 0.003                   | 0.102 |
| MED1          | F  | 2.071        | 18.853  | 0.268       |                         |       |
|               | df | 1,28         | 1,28    | 1,28        |                         |       |
|               | p  | 0.161        | <0.001  | 0.609       | 0.118                   | 0.233 |

Muscle abbreviations (Tables S10-S11):

B2-AR, Beta-2 adrenergic receptor; UCP2 and 3, uncoupling protein 2 and 3; PPAR, peroxisome proliferator activated receptor; PGC1α, PPARγ coactivator-1α; SERCA, sarco/endoplasmic reticulum Ca<sup>2+</sup>-ATPase; Kir6.1 and 6.2, components of ATP-gated K<sup>+</sup>-channel; MED1, Mediator of RNA polymerase II transcription subunit 1.

**Table S11.** Statistical results from analyses examining the effect of intra-ventromedial hypothalamic (VMH) Melanotan II (MTII) and vehicle on quadriceps mRNA expression using qPCR in high- and low-capacity runners (HCR, LCR).

| Quadriceps |    | Main effects |         | Interaction | t-test for MTII≠vehicle |       |
|------------|----|--------------|---------|-------------|-------------------------|-------|
|            |    | MTII/vehicle | HCR/LCR |             | HCR                     | LCR   |
| β2-AR      | F  | 4.352        | 20.736  | 0.269       |                         |       |
|            | df | 1,28         | 1,28    | 1,28        |                         |       |
|            | p  | 0.046        | <0.001  | 0.608       | 0.056                   | 0.121 |
| UCP2       | F  | 15.45        | 18.064  | 1.042       |                         |       |
|            | df | 1,28         | 1,28    | 1,28        |                         |       |
|            | p  | 0.001        | <0.001  | 0.316       | 0.007                   | 0.004 |
| UCP3       | F  | 18.581       | 27.072  | 1.723       |                         |       |
|            | df | 1,28         | 1,28    | 1,28        |                         |       |
|            | p  | <0.001       | <0.001  | 0.2         | 0.004                   | 0.002 |
| PPARα      | F  | 7.746        | 32.282  | 0.855       |                         |       |
|            | df | 1,28         | 1,28    | 1,28        |                         |       |
|            | p  | 0.01         | <0.001  | 0.363       | 0.006                   | 0.121 |
| PPARδ      | F  | 7.163        | 35.755  | 3.233       |                         |       |
|            | df | 1,28         | 1,28    | 1,28        |                         |       |
|            | p  | 0.012        | <0.001  | 0.083       | 0.006                   | 0.253 |
| PPARγ      | F  | 3.829        | 31.905  | 1.311       |                         |       |
|            | df | 1,28         | 1,28    | 1,28        |                         |       |
|            | p  | 0.06         | <0.001  | 0.262       | 0.034                   | 0.261 |
| PGC1α      | F  | 3.86         | 10.493  | 0.926       |                         |       |
|            | df | 1,28         | 1,28    | 1,28        |                         |       |
|            | p  | 0.059        | 0.003   | 0.344       | 0.033                   | 0.237 |
| SERCA1     | F  | 5.653        | 24.607  | 2.303       |                         |       |
|            | df | 1,28         | 1,28    | 1,28        |                         |       |
|            | p  | 0.024        | <0.001  | 0.14        | 0.010                   | 0.266 |
| SERCA2     | F  | 4.886        | 57.654  | 1.1         |                         |       |
|            | df | 1,28         | 1,28    | 1,28        |                         |       |
|            | p  | 0.035        | <0.001  | 0.303       | 0.005                   | 0.250 |
| Kir6.1     | F  | 3.206        | 31.955  | 0.017       |                         |       |
|            | df | 1,28         | 1,28    | 1,28        |                         |       |
|            | p  | 0.084        | <0.001  | 0.897       | 0.069                   | 0.156 |
| Kir6.2     | F  | 1.401        | 16.331  | 0.046       |                         |       |
|            | df | 1,28         | 1,28    | 1,28        |                         |       |
|            | p  | 0.246        | <0.001  | 0.832       | 0.273                   | 0.139 |
| MED1       | F  | 1.304        | 16.024  | 0.084       |                         |       |
|            | df | 1,28         | 1,28    | 1,28        |                         |       |
|            | p  | 0.263        | <0.001  | 0.774       | 0.261                   | 0.182 |



**Table S12.** Statistical results from analyses examining the effect of intra-ventromedial hypothalamic (VMH) Melanotan II (MTII) and vehicle on brown adipose tissue (BAT) protein expression using Western blot in high- and low-capacity runners (HCR, LCR).

| Brown adipose tissue (BAT) |    | Main effects |         | Interaction | t-test for MTII≠vehicle |       |
|----------------------------|----|--------------|---------|-------------|-------------------------|-------|
|                            |    | MTII/vehicle | HCR/LCR |             | HCR                     | LCR   |
| β3-AR                      | F  | 2.644        | 11.725  | 0.192       |                         |       |
|                            | df | 1,10         | 1,10    | 1,10        |                         |       |
|                            | p  | 0.135        | 0.007   | 0.671       | 0.258                   | 0.054 |
| UCP1                       | F  | 9.374        | 62.4    | 0.914       |                         |       |
|                            | df | 1,10         | 1,10    | 1,10        |                         |       |
|                            | p  | 0.012        | <0.001  | 0.362       | 0.009                   | 0.125 |
| PPARα                      | F  | 2.02         | 3.82    | 0.202       |                         |       |
|                            | df | 1,10         | 1,10    | 1,10        |                         |       |
|                            | p  | 0.186        | 0.079   | 0.663       | 0.140                   | 0.240 |
| PPARδ                      | F  | 1.029        | 1.575   | 0.05        |                         |       |
|                            | df | 1,10         | 1,10    | 1,10        |                         |       |
|                            | p  | 0.334        | 0.238   | 0.827       | 0.203                   | 0.306 |
| PPARγ                      | F  | 1.405        | 9.053   | 0.037       |                         |       |
|                            | df | 1,10         | 1,10    | 1,10        |                         |       |
|                            | p  | 0.263        | 0.013   | 0.851       | 0.244                   | 0.200 |
| PGC1α                      | F  | 5.018        | 18.86   | 1.036       |                         |       |
|                            | df | 1,10         | 1,10    | 1,10        |                         |       |
|                            | p  | 0.049        | 0.001   | 0.333       | 0.023                   | 0.236 |
| ACC                        | F  | 0.000        | 0.416   | 0.005       |                         |       |
|                            | df | 1,10         | 1,10    | 1,10        |                         |       |
|                            | p  | 0.983        | 0.533   | 0.945       | 0.485                   | 0.477 |
| pACC                       | F  | 10.578       | 10.765  | 2.114       |                         |       |
|                            | df | 1,10         | 1,10    | 1,10        |                         |       |
|                            | p  | 0.009        | 0.008   | 0.176       | 0.013                   | 0.115 |
| AMPK                       | F  | 0.039        | 0.053   | 0.000       |                         |       |
|                            | df | 1,10         | 1,10    | 1,10        |                         |       |
|                            | p  | 0.847        | 0.822   | 0.996       | 0.438                   | 0.453 |
| pAMPK                      | F  | 14.061       | 16.655  | 1.558       |                         |       |
|                            | df | 1,10         | 1,10    | 1,10        |                         |       |
|                            | p  | 0.004        | 0.002   | 0.24        | 0.008                   | 0.069 |
| CD36 (FAT)                 | F  | 0.24         | 1.324   | 0.016       |                         |       |
|                            | df | 1,10         | 1,10    | 1,10        |                         |       |
|                            | p  | 0.635        | 0.277   | 0.903       | 0.412                   | 0.323 |
| FAS                        | F  | 0.037        | 0.02    | 0.000       |                         |       |
|                            | df | 1,10         | 1,10    | 1,10        |                         |       |
|                            | p  | 0.852        | 0.89    | 0.992       | 0.447                   | 0.450 |

Table S12 abbreviations:

B3-AR, Beta-3 adrenergic receptor; UCP1, uncoupling protein 1; PPAR, peroxisome proliferator activated receptor; PGC1α, PPARγ coactivator-1α; (p)ACC, (phosphor-)acetyl-CoA carboxylase; (p)AMPK, (phospho-)AMP-activated protein kinase; CD36, fatty acid translocase; FAS, fatty acid synthase.

**Table S13.** Statistical results from analyses examining the effect of intra-ventromedial hypothalamic (VMH) Melanotan II (MTII) and vehicle on white adipose tissue (WAT) protein expression using Western blot in high- and low-capacity runners (HCR, LCR).

| White adipose tissue (WAT) |    | Main effects |         | Interaction | t-test for MTII≠vehicle |       |
|----------------------------|----|--------------|---------|-------------|-------------------------|-------|
|                            |    | MTII/vehicle | HCR/LCR |             | HCR                     | LCR   |
| β3-AR                      | F  | 1.87         | 15.865  | 0.089       |                         |       |
|                            | df | 1,10         | 1,10    | 1,10        |                         |       |
|                            | p  | 0.201        | 0.003   | 0.772       | 0.135                   | 0.251 |
| UCP2                       | F  | 0.852        | 5.761   | 0.052       |                         |       |
|                            | df | 1,10         | 1,10    | 1,10        |                         |       |
|                            | p  | 0.378        | 0.037   | 0.824       | 0.239                   | 0.311 |
| PPARα                      | F  | 1.446        | 1.677   | 0.000       |                         |       |
|                            | df | 1,10         | 1,10    | 1,10        |                         |       |
|                            | p  | 0.257        | 0.224   | 0.996       | 0.151                   | 0.256 |
| PPARδ                      | F  | 0.127        | 0.056   | 0.001       |                         |       |
|                            | df | 1,10         | 1,10    | 1,10        |                         |       |
|                            | p  | 0.729        | 0.817   | 0.971       | 0.408                   | 0.400 |
| PPARγ                      | F  | 2.453        | 2.831   | 0.11        |                         |       |
|                            | df | 1,10         | 1,10    | 1,10        |                         |       |
|                            | p  | 0.148        | 0.123   | 0.747       | 0.098                   | 0.230 |
| PGC1α                      | F  | 2.448        | 6.458   | 0.108       |                         |       |
|                            | df | 1,10         | 1,10    | 1,10        |                         |       |
|                            | p  | 0.149        | 0.029   | 0.749       | 0.105                   | 0.225 |
| ACC                        | F  | 0.003        | 0.479   | 0.000       |                         |       |
|                            | df | 1,10         | 1,10    | 1,10        |                         |       |
|                            | p  | 0.959        | 0.505   | 1.000       | 0.486                   | 0.486 |
| pACC                       | F  | 4.04         | 1.222   | 0.000       |                         |       |
|                            | df | 1,10         | 1,10    | 1,10        |                         |       |
|                            | p  | 0.072        | 0.297   | 0.988       | 0.110                   | 0.105 |
| AMPK                       | F  | 0.012        | 0.007   | 0.003       |                         |       |
|                            | df | 1,10         | 1,10    | 1,10        |                         |       |
|                            | p  | 0.916        | 0.936   | 0.956       | 0.487                   | 0.454 |
| pAMPK                      | F  | 7.565        | 1.962   | 1.301       |                         |       |
|                            | df | 1,10         | 1,10    | 1,10        |                         |       |
|                            | p  | 0.02         | 0.192   | 0.281       | 0.023                   | 0.144 |
| CD36 (FAT)                 | F  | 0.003        | 0.543   | 0.000       |                         |       |
|                            | df | 1,10         | 1,10    | 1,10        |                         |       |
|                            | p  | 0.954        | 0.478   | 0.997       | 0.484                   | 0.484 |
| FAS                        | F  | 0.19         | 0.168   | 0.013       |                         |       |
|                            | df | 1,10         | 1,10    | 1,10        |                         |       |
|                            | p  | 0.672        | 0.69    | 0.912       | 0.352                   | 0.417 |

Table S13 abbreviations:

B3-AR, Beta-3 adrenergic receptor; UCP2, uncoupling protein 2; PPAR, peroxisome proliferator activated receptor; PGC1α, PPARγ coactivator-1α; (p)ACC, (phosphor-)acetyl-CoA carboxylase; (p)AMPK, (phospho-)AMP-activated protein kinase; CD36, fatty acid translocase; FAS, fatty acid synthase.

**Table S14.** Statistical results from analyses examining the effect of intra-ventromedial hypothalamic (VMH) Melanotan II (MTII) and vehicle on liver protein expression using Western blot in high- and low-capacity runners (HCR, LCR).

| Liver      |    | Main effects |         | Interaction | t-test for MTII≠vehicle |       |
|------------|----|--------------|---------|-------------|-------------------------|-------|
|            |    | MTII/vehicle | HCR/LCR |             | HCR                     | LCR   |
| β2-AR      | F  | 1.715        | 9.737   | 0.131       |                         |       |
|            | df | 1,10         | 1,10    | 1,10        |                         |       |
|            | p  | 0.22         | 0.011   | 0.725       | 0.283                   | 0.123 |
| UCP2       | F  | 2.294        | 16.113  | 0.067       |                         |       |
|            | df | 1,10         | 1,10    | 1,10        |                         |       |
|            | p  | 0.161        | 0.002   | 0.802       | 0.152                   | 0.183 |
| PPARα      | F  | 3.693        | 4.178   | 0.096       |                         |       |
|            | df | 1,10         | 1,10    | 1,10        |                         |       |
|            | p  | 0.084        | 0.068   | 0.763       | 0.110                   | 0.121 |
| PPARδ      | F  | 4.3          | 11.853  | 0.629       |                         |       |
|            | df | 1,10         | 1,10    | 1,10        |                         |       |
|            | p  | 0.065        | 0.006   | 0.446       | 0.054                   | 0.194 |
| PPARγ      | F  | 3.628        | 17.526  | 0.265       |                         |       |
|            | df | 1,10         | 1,10    | 1,10        |                         |       |
|            | p  | 0.086        | 0.002   | 0.618       | 0.054                   | 0.209 |
| PGC1α      | F  | 0.693        | 10.01   | 0.521       |                         |       |
|            | df | 1,10         | 1,10    | 1,10        |                         |       |
|            | p  | 0.425        | 0.01    | 0.487       | 0.181                   | 0.467 |
| AMPK       | F  | 0.000        | 0.013   | 0.001       |                         |       |
|            | df | 1,10         | 1,10    | 1,10        |                         |       |
|            | p  | 0.986        | 0.912   | 0.978       | 0.487                   | 0.497 |
| pAMPK      | F  | 6.219        | 10.559  | 2.052       |                         |       |
|            | df | 1,10         | 1,10    | 1,10        |                         |       |
|            | p  | 0.032        | 0.009   | 0.182       | 0.019                   | 0.246 |
| CD36 (FAT) | F  | 0.427        | 7.195   | 0.085       |                         |       |
|            | df | 1,10         | 1,10    | 1,10        |                         |       |
|            | p  | 0.528        | 0.023   | 0.776       | 0.275                   | 0.400 |
| FAS        | F  | 0.003        | 0.085   | 0.031       |                         |       |
|            | df | 1,10         | 1,10    | 1,10        |                         |       |
|            | p  | 0.955        | 0.776   | 0.865       | 0.438                   | 0.469 |

Table S14 abbreviations:

B3-AR, Beta-3 adrenergic receptor; UCP1, uncoupling protein 1; PPAR, peroxisome proliferator activated receptor; PGC1α, PPARγ coactivator-1α; (p)AMPK, (phospho-)AMP-activated protein kinase; CD36, fatty acid translocase; FAS, fatty acid synthase.

**Table S15.** Statistical results from analyses examining the effect of intra-ventromedial hypothalamic (VMH) Melanotan II (MTII) and vehicle on gastrocnemius protein expression using Western blot in high- and low-capacity runners (HCR, LCR).

| Gastrocnemius |    | Main effects |         | Interaction | t-test for MTII≠vehicle |       |
|---------------|----|--------------|---------|-------------|-------------------------|-------|
|               |    | MTII/vehicle | HCR/LCR |             | HCR                     | LCR   |
| β2-AR         | F  | 3.07         | 21.328  | 0.347       |                         |       |
|               | df | 1,10         | 1,10    | 1,10        |                         |       |
|               | p  | 0.11         | 0.001   | 0.569       | 0.073                   | 0.232 |
| UCP2          | F  | 1.019        | 23.156  | 0.131       |                         |       |
|               | df | 1,10         | 1,10    | 1,10        |                         |       |
|               | p  | 0.337        | 0.001   | 0.725       | 0.183                   | 0.337 |
| UCP3          | F  | 1.5585       | 27.783  | 0.572       |                         |       |
|               | df | 1,10         | 1,10    | 1,10        |                         |       |
|               | p  | 0.237        | <0.001  | 0.467       | 0.112                   | 0.365 |
| PPARα         | F  | 2.658        | 18.262  | 0.006       |                         |       |
|               | df | 1,10         | 1,10    | 1,10        |                         |       |
|               | p  | 0.134        | 0.002   | 0.941       | 0.157                   | 0.142 |
| PPARδ         | F  | 3.653        | 18.654  | 0.089       |                         |       |
|               | df | 1,10         | 1,10    | 1,10        |                         |       |
|               | p  | 0.085        | 0.002   | 0.771       | 0.106                   | 0.130 |
| PPARγ         | F  | 4.359        | 20.371  | 0.517       |                         |       |
|               | df | 1,10         | 1,10    | 1,10        |                         |       |
|               | p  | 0.063        | 0.001   | 0.489       | 0.059                   | 0.177 |
| PGC1α         | F  | 5.534        | 31.995  | 1.272       |                         |       |
|               | df | 1,10         | 1,10    | 1,10        |                         |       |
|               | p  | 0.04         | <0.001  | 0.286       | 0.023                   | 0.226 |
| SERCA1        | F  | 5.843        | 31.356  | 0.581       |                         |       |
|               | df | 1,10         | 1,10    | 1,10        |                         |       |
|               | p  | 0.036        | <0.001  | 0.463       | 0.026                   | 0.169 |
| SERCA2        | F  | 3.609        | 42.549  | 0.991       |                         |       |
|               | df | 1,10         | 1,10    | 1,10        |                         |       |
|               | p  | 0.087        | <0.001  | 0.343       | 0.051                   | 0.271 |
| Kir6.1        | F  | 0.161        | 12.388  | 0.000       |                         |       |
|               | df | 1,10         | 1,10    | 1,10        |                         |       |
|               | p  | 0.697        | 0.006   | 0.998       | 0.384                   | 0.402 |
| Kir6.2        | F  | 0.057        | 27.232  | 0.037       |                         |       |
|               | df | 1,10         | 1,10    | 1,10        |                         |       |
|               | p  | 0.817        | <0.001  | 0.851       | 0.377                   | 0.489 |
| MED1          | F  | 0.085        | 33      | 0.057       |                         |       |
|               | df | 1,10         | 1,10    | 1,10        |                         |       |
|               | p  | 0.777        | <0.001  | 0.816       | 0.487                   | 0.357 |

Table S15-S16 abbreviations:

B2-AR, Beta-2 adrenergic receptor; UCP2 and 3, uncoupling protein 2 and 3; PPAR, peroxisome proliferator activated receptor; PGC1α, PPARγ coactivator-1α; SERCA, sarco/endoplasmic reticulum Ca<sup>2+</sup>-ATPase; Kir6.1 and 6.2, components of ATP-gated K<sup>+</sup>-channel; MED1, Mediator of RNA polymerase II transcription subunit 1; (p)AMPK, (phospho-)AMP-activated protein kinase; CD36, fatty acid translocase; FAS, fatty acid synthase.

|            |    |        |        |       |       |       |
|------------|----|--------|--------|-------|-------|-------|
| ACC        | F  | 0.118  | 1.134  | 0.102 |       |       |
|            | df | 1,10   | 1,10   | 1,10  |       |       |
|            | p  | 0.738  | 0.312  | 0.756 | 0.494 | 0.321 |
| pACC       | F  | 10.516 | 28.566 | 0.986 |       |       |
|            | df | 1,10   | 1,10   | 1,10  |       |       |
|            | p  | 0.009  | <0.001 | 0.344 | 0.015 | 0.086 |
| AMPK       | F  | 0.002  | 0.012  | 0.001 |       |       |
|            | df | 1,10   | 1,10   | 1,10  |       |       |
|            | p  | 0.965  | 0.917  | 0.973 | 0.479 | 0.497 |
| pAMPK      | F  | 11.619 | 25.222 | 0.757 |       |       |
|            | df | 1,10   | 1,10   | 1,10  |       |       |
|            | p  | 0.007  | 0.001  | 0.405 | 0.012 | 0.074 |
| CD36 (FAT) | F  | 2.41   | 14.068 | 0.156 |       |       |
|            | df | 1,10   | 1,10   | 1,10  |       |       |
|            | p  | 0.152  | 0.004  | 0.701 | 0.114 | 0.224 |
| FAS        | F  | 0.04   | 1.211  | 0.024 |       |       |
|            | df | 1,10   | 1,10   | 1,10  |       |       |
|            | p  | 0.845  | 0.297  | 0.879 | 0.408 | 0.488 |

**Table S16.** Statistical results from analyses examining the effect of intra-ventromedial hypothalamic (VMH) Melanotan II (MTII) and vehicle on quadriceps protein expression using Western blot in high- and low-capacity runners (HCR, LCR).

| Quadriceps |    | Main effects |         | Interaction | t-test for MTII≠vehicle |       |
|------------|----|--------------|---------|-------------|-------------------------|-------|
|            |    | MTII/vehicle | HCR/LCR |             | HCR                     | LCR   |
| β2-AR      | F  | 0.633        | 7.983   | 0.027       |                         |       |
|            | df | 1,10         | 1,10    | 1,10        |                         |       |
|            | p  | 0.445        | 0.018   | 0.872       | 0.275                   | 0.327 |
| UCP2       | F  | 0.494        | 23.761  | 0.118       |                         |       |
|            | df | 1,10         | 1,10    | 1,10        |                         |       |
|            | p  | 0.498        | 0.001   | 0.739       | 0.251                   | 0.402 |
| UCP3       | F  | 0.766        | 24.987  | 0.263       |                         |       |
|            | df | 1,10         | 1,10    | 1,10        |                         |       |
|            | p  | 0.402        | 0.001   | 0.619       | 0.198                   | 0.398 |
| PPARα      | F  | 0.731        | 6.775   | 0.078       |                         |       |
|            | df | 1,10         | 1,10    | 1,10        |                         |       |
|            | p  | 0.413        | 0.026   | 0.785       | 0.245                   | 0.338 |
| PPARδ      | F  | 0.02         | 6.22    | 0.066       |                         |       |
|            | df | 1,10         | 1,10    | 1,10        |                         |       |
|            | p  | 0.89         | 0.032   | 0.802       | 0.401                   | 0.467 |
| PPARγ      | F  | 1.151        | 10.182  | 0.303       |                         |       |
|            | df | 1,10         | 1,10    | 1,10        |                         |       |
|            | p  | 0.173        | 0.01    | 0.594       | 0.126                   | 0.249 |

|               |    |       |        |       |       |       |
|---------------|----|-------|--------|-------|-------|-------|
| PGC1 $\alpha$ | F  | 2.279 | 30.836 | 0.196 |       |       |
|               | df | 1,10  | 1,10   | 1,10  |       |       |
|               | p  | 0.162 | <0.001 | 0.667 | 0.109 | 0.246 |
| SERCA1        | F  | 3.919 | 19.141 | 0.397 |       |       |
|               | df | 1,10  | 1,10   | 1,10  |       |       |
|               | p  | 0.076 | 0.001  | 0.543 | 0.047 | 0.212 |
| SERCA2        | F  | 2.538 | 20.539 | 0.13  |       |       |
|               | df | 1,10  | 1,10   | 1,10  |       |       |
|               | p  | 0.142 | 0.001  | 0.726 | 0.116 | 0.208 |
| Kir6.1        | F  | 0.118 | 3.612  | 0.01  |       |       |
|               | df | 1,10  | 1,10   | 1,10  |       |       |
|               | p  | 0.739 | 0.087  | 0.923 | 0.418 | 0.400 |
| Kir6.2        | F  | 0.405 | 24.289 | 0.000 |       |       |
|               | df | 1,10  | 1,10   | 1,10  |       |       |
|               | p  | 0.539 | 0.001  | 0.985 | 0.336 | 0.335 |
| MED1          | F  | 0.216 | 32.532 | 0.024 |       |       |
|               | df | 1,10  | 1,10   | 1,10  |       |       |
|               | p  | 0.652 | <0.001 | 0.881 | 0.415 | 0.344 |
| ACC           | F  | 0.162 | 0.877  | 0.020 |       |       |
|               | df | 1,10  | 1,10   | 1,10  |       |       |
|               | p  | 0.695 | 0.731  | 0.890 | 0.435 | 0.346 |
| pACC          | F  | 3.077 | 5.656  | 0.330 |       |       |
|               | df | 1,10  | 1,10   | 1,10  |       |       |
|               | p  | 0.110 | 0.039  | 0.578 | 0.081 | 0.220 |
| AMPK          | F  | 0.010 | 0.000  | 0.000 |       |       |
|               | df | 1,10  | 1,10   | 1,10  |       |       |
|               | p  | 0.923 | 0.991  | 0.995 | 0.472 | 0.474 |
| pAMPK         | F  | 6.679 | 20.554 | 0.300 |       |       |
|               | df | 1,10  | 1,10   | 1,10  |       |       |
|               | p  | 0.027 | 0.001  | 0.596 | 0.041 | 0.101 |
| CD36 (FAT)    | F  | 0.081 | 6.323  | 0.039 |       |       |
|               | df | 1,10  | 1,10   | 1,10  |       |       |
|               | p  | 0.782 | 0.031  | 0.847 | 0.369 | 0.477 |
| FAS           | F  | 0.002 | 0.002  | 0.024 |       |       |
|               | df | 1,10  | 1,10   | 1,10  |       |       |
|               | p  | 0.966 | 0.964  | 0.880 | 0.452 | 0.466 |
